# Supplementary material for: RNA N6-methyladenosine reader YTHDC1 is essential for TGF-beta-mediated metastasis of triple negative breast cancer
Source: PubMed Central journal article supplement (PMC9373808; doi:10.7150/thno.71872), 2022-07-18
Supplement: thnov12p5727s1.pdf [file thnov12p5727s1.pdf]

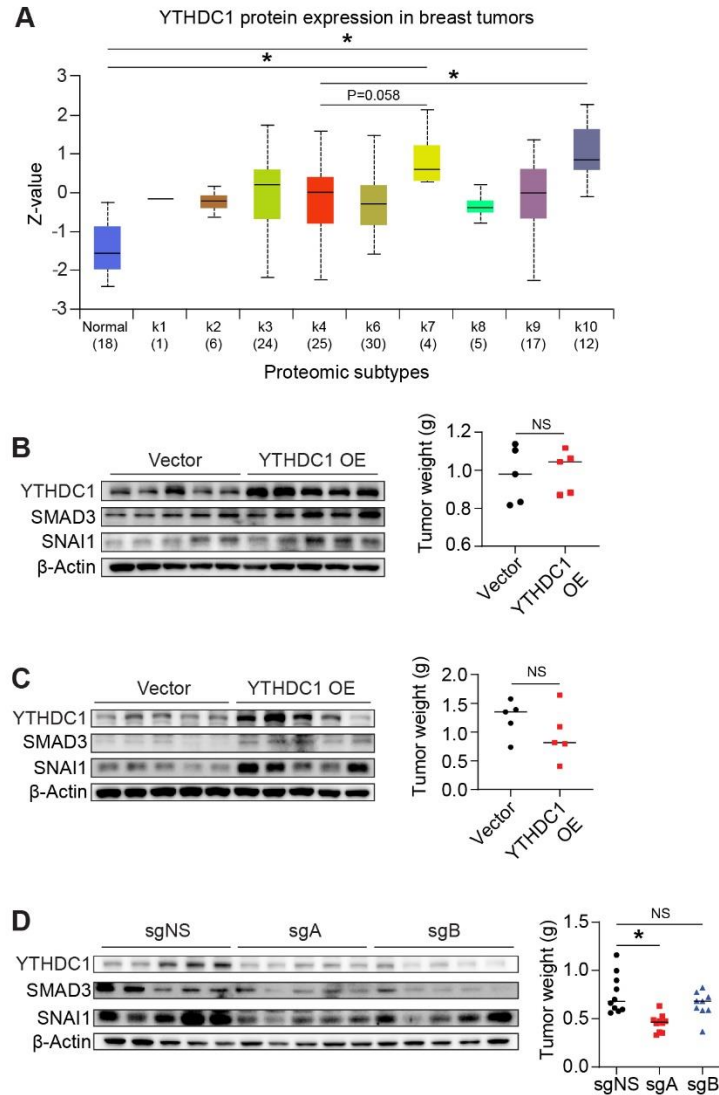

**Figure S1.** YTHDC1 protein expression in primary tumor samples and tumor weights. **A)** Box-whisker plot of YTHDC1 protein levels in breast tumors from different proteomic profile clusters. Proteomic profiles defined as: k1, Over-expression of proteasome complex proteins, glycolysis proteins, and pentose phosphate pathway proteins; k2, Adaptive immune system-related; k3, Innate immune system-related; k4, basal-like breast cancer; k6, Stromal-related, over-expression of matrix metalloproteinases; k7, Stromal-related, over-expression of collagen VI proteins; Wnt and Notch pathway signatures; k8, Over-expression of Golgi apparatus-related

proteins; k9, Found in clear cell renal cell carcinoma cases only; and k10, Over-expression of endoplasmic reticulum-related proteins. Numbers in parentheses indicate sample size. *t-test*.

\* $P < 0.05$ , NS = not significant. **B)** Western Blot for primary tumors from MDA-MB-231 YTHDC1 OE mice (left) and primary tumor weight comparison (right).  $n = 5/\text{group}$ . *t-test*, NS = not significant. **C)** Western Blot for primary tumors from SUM159 YTHDC1 OE mice (left) and primary tumor weight comparison (right).  $n = 5/\text{group}$ . *t-test*, NS = not significant. **D)** Western Blot for primary tumors from MDA-MB-231 YTHDC1 KO mice (left) and primary tumor weight comparison (right).  $n = 5/\text{group}$  for Western Blot and  $10/\text{group}$  for tumor weight. One-way ANOVA compared to sgNS, \* $P < 0.05$ , NS = not significant.

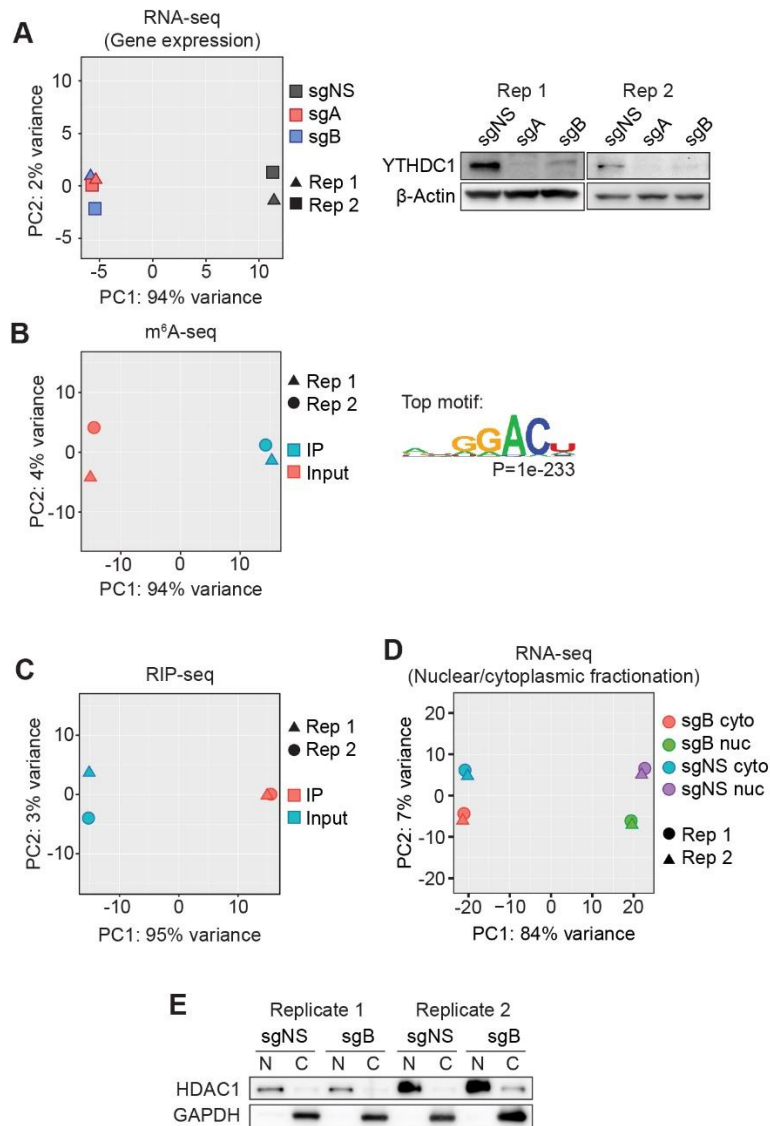

**Figure S2.** Reproducibility of sequencing data and verification of nuclear/cytoplasmic fractionation of MDA-MB-231 YTHDC1 KO cells by Western Blot. Two biological replicates were done for each experiment. **A)** PCA of poly(A) RNA-seq data from MDA-MB-231 YTHDC1 KO cells used to determine gene expression and Western Blot showing YTHDC1 KO efficiency. **B)** PCA of m<sup>6</sup>A-seq data from MDA-MB-231 cells showing m<sup>6</sup>A-immunoprecipitated (IP) and input groups and the most highly enriched motif from m<sup>6</sup>A peaks. **C)** PCA of RIP-seq data from MDA-MB-231 cells overexpressing YTHDC1 showing Flag-

immunoprecipitated (IP) and input groups. **D)** PCA of RNA-seq data from nuclear and cytoplasmic fractions of MDA-MB-231 YTHDC1 KO cells (sgB) and control cells (sgNS). **E)** Western Blot verifying nuclear/cytoplasmic fractionation of MDA-MB-231 YTHDC1 KO and control cells used in nuclear/cytoplasmic RNA-seq. HDAC1 was used as a nuclear marker and GAPDH was used as a cytoplasmic marker.

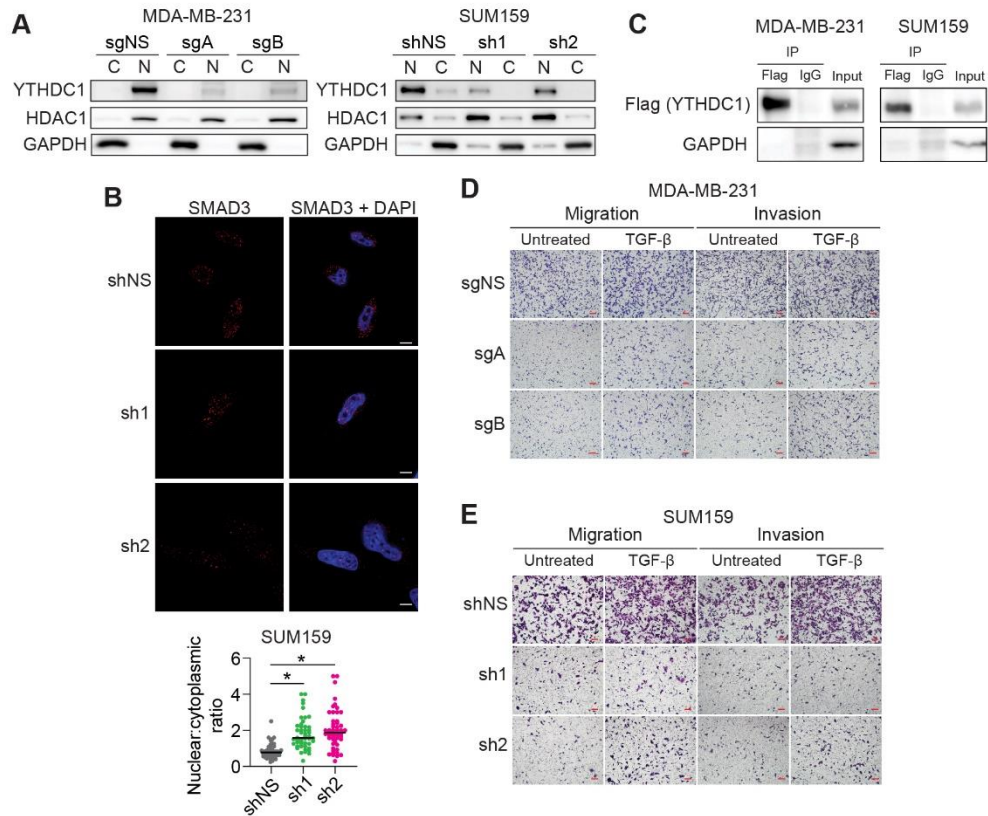

**Figure S3.** Western Blots for RIP-RT-qPCR and nuclear/cytoplasmic fractionation experiments and SMAD3 FISH. **A)** Nuclear/cytoplasmic fractionation of MDA-MB-231 YTHDC1 KO cells and SUM159 YTHDC1 KD cells. **B)** Representative images and quantification of SMAD3 mRNA localization by FISH following YTHDC1 KD in SUM159 cells. Scale bar: 10  $\mu$ m. Each point on the graph represents a single cell. One-way ANOVA compared to sgNS. n = 50/group. **C)** Western Blots showing immunoprecipitation efficiency of Flag-YTHDC1 in MDA-MB-231 and SUM159 cells. **D-E)** Transwell migration and invasion images for **(D)** MDA-MB-231 YTHDC1 KO or **(E)** SUM159 YTHDC1 KD cells treated with or without TGF- $\beta$ . Scale bar: 100  $\mu$ m.

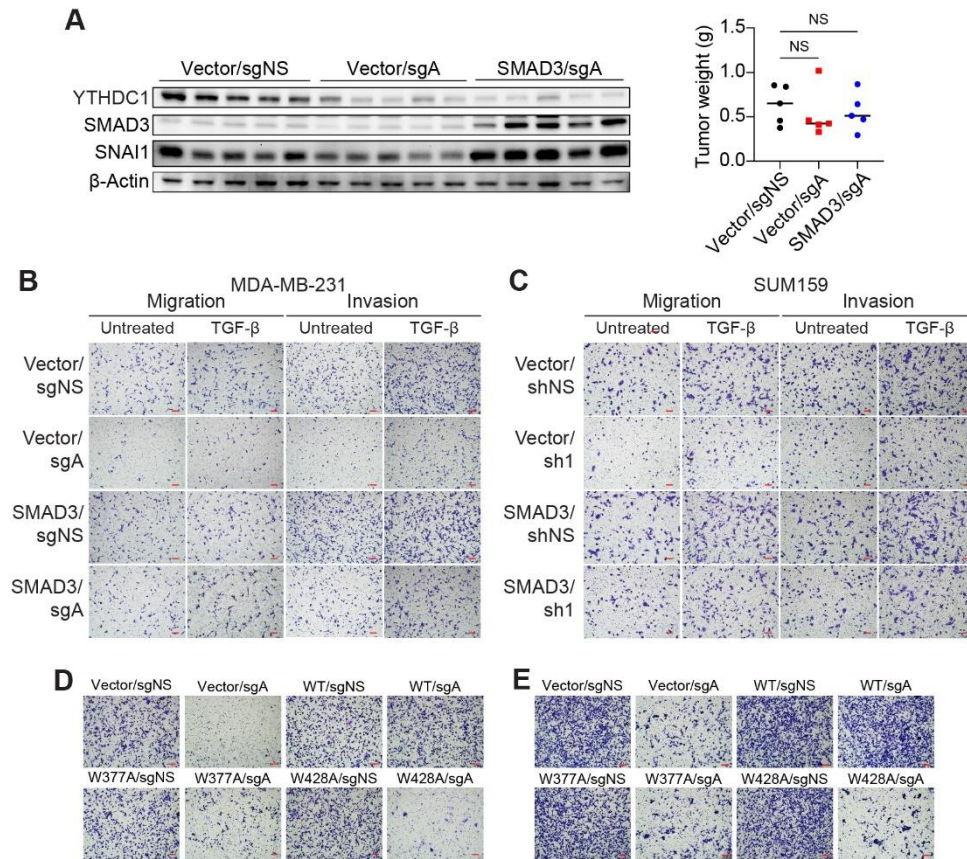

**Figure S4.** SMAD3 *in vivo* rescue experiment and Transwell migration and invasion images. **A**) Western Blot for primary tumors from MDA-MB-231 YTHDC1 KO SMAD3 rescue mice (left) and weight of primary tumor comparison (right).  $n = 5/\text{group}$ . One-way ANOVA, NS = not significant. **B-C**) Images from Transwell migration and invasion assay of **(B)** MDA-MB-231 YTHDC1 KO or **(C)** SUM159 YTHDC1 KD cells overexpressing SMAD3 treated with TGF- $\beta$ . **D-E**) Transwell migration **(D)** and invasion **(E)** images of YTHDC1 KO or control MDA-MB-231 cells overexpressing different YTHDC1 mutants. Scale bar: 100  $\mu\text{m}$ .

**Table S1.** List of plasmids.

| Plasmid name                           | Source           | Notes                                                                                                                  |
|----------------------------------------|------------------|------------------------------------------------------------------------------------------------------------------------|
| psPAX2                                 | Addgene<br>12260 | A gift from Didier Trono.                                                                                              |
| PMD2.G                                 | Addgene<br>12259 | A gift from Didier Trono.                                                                                              |
| lentiCas9-Blast                        | Addgene<br>52962 | A gift from Feng Zhang.                                                                                                |
| pCDH-CMV-3xflag-YTHDC1-Puro            | This paper       | Used for MCF10A YTHDC1 overexpression experiment, animal studies, RNA-stability experiments, CLIP-RT-qPCR and RIP-seq. |
| pCDH-CMV-3xflag-YTHDC1 WT-mutA-Puro    | This paper       | Synonymous mutations at the sgA site. Used in rescue experiments.                                                      |
| pCDH-CMV-3xflag-YTHDC1 W377A-mutA-Puro | This paper       | Synonymous mutations at the sgA site. Used in rescue experiments.                                                      |
| pCDH-CMV-3xflag-YTHDC1 W428A-mutA-Puro | This paper       | Synonymous mutations at the sgA site. Used in rescue experiments.                                                      |
| PLX-CMV-myc-SMAD3-Blast                | This paper       |                                                                                                                        |
| pGL3-basic-firefly luc-WT-SMAD3 3'UTR  | This paper       | WT SMAD3 3'UTR cloned into pGL3-basic-firefly luciferase vector (E1751, Promega).                                      |
| pGL3-basic-firefly luc-mut-SMAD3 3'UTR | This paper       | Mutant SMAD3 3'UTR cloned into pGL3-basic-firefly luciferase vector (E1751, Promega).                                  |
| PRL-TK (renilla luciferase)            | Promega<br>E2241 |                                                                                                                        |

**Table S2.** List of oligonucleotides used for RT-qPCR.

| Name                                   | Sequence               |
|----------------------------------------|------------------------|
| Human ACTB F                           | CACTCTTCCAGCCTTCCTTC   |
| Human ACTB R                           | GTACAGGTCTTTGCGGATGT   |
| Human SMAD3 F                          | AACTCAAGAAGACGGGGCAG   |
| Human SMAD3 R                          | CTGGGGATGGTGATGCACTT   |
| Human SMAD3 m <sup>6</sup> A-RT-qPCR F | CTGTTGCAACTCGGCTGTTC   |
| Human SMAD3 m <sup>6</sup> A-RT-qPCR R | AGGCTGGCCGAATAGTGAAG   |
| Human HPRT1 F                          | TTGCTTTCCTTGGTGAGGCA   |
| Human HPRT1 R                          | ATCCAACACTTCGTGGGGTC   |
| Human SNAI1 F                          | TGCCCTCAAGATGCACATCCGA |
| Human SNAI1 R                          | GGGACAGGAGAAGGGCTTCTC  |
| Human Fibronectin F                    | ACAACACCGAGGTGACTGAGAC |
| Human Fibronectin R                    | GGACACAACGATGCTTCCTGAG |

|                      |                          |
|----------------------|--------------------------|
| Human IL11 F         | TTCAGTACTGGGGGCGAAAC     |
| Human IL11 R         | AATAAGGCACAGATGCCCCC     |
| Human CDH1 F         | GCCTCCTGAAAAGAGAGTGGAAG  |
| Human CDH1 R         | TGGCAGTGTCTCTCCAAATCCG   |
| Human CLDN7 F        | TAGCTTGCTCCTGGTATGGC     |
| Human CLDN7 R        | TGGCAGGGCCAAACTCATAC     |
| Firefly luciferase F | ATGGAAGACGCCAAAAACATAAAG |
| Firefly luciferase R | GCGGAACTCCCAAGCTTATCG    |
